# Supplementary material
Source: PubMed Central journal article supplement (PMC3086346)

Supplementary data;  
Figure 1: WT Dex  
suppl. data

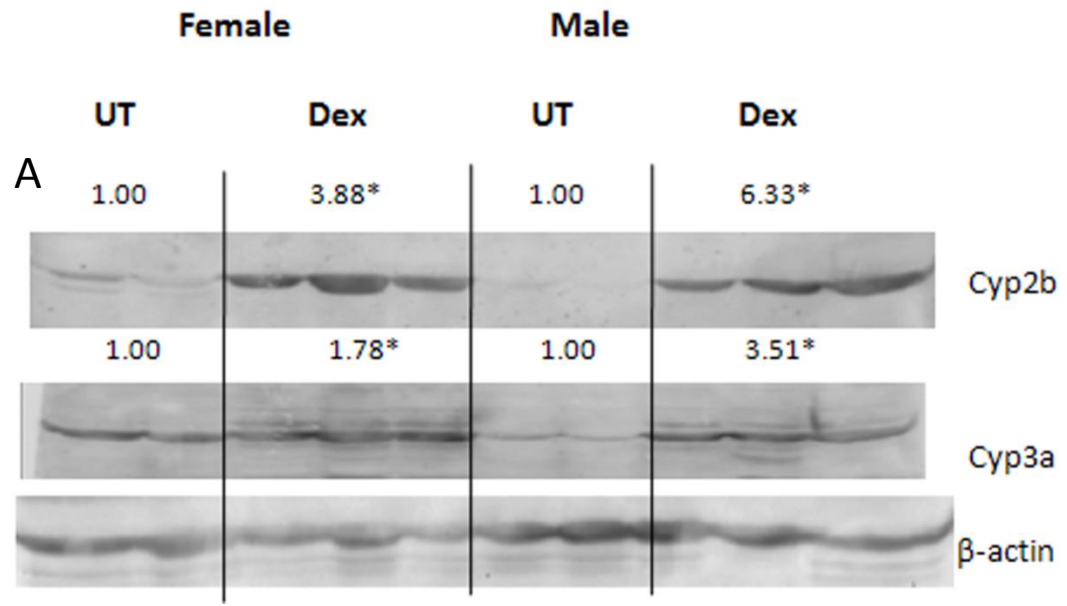

mPXR mice

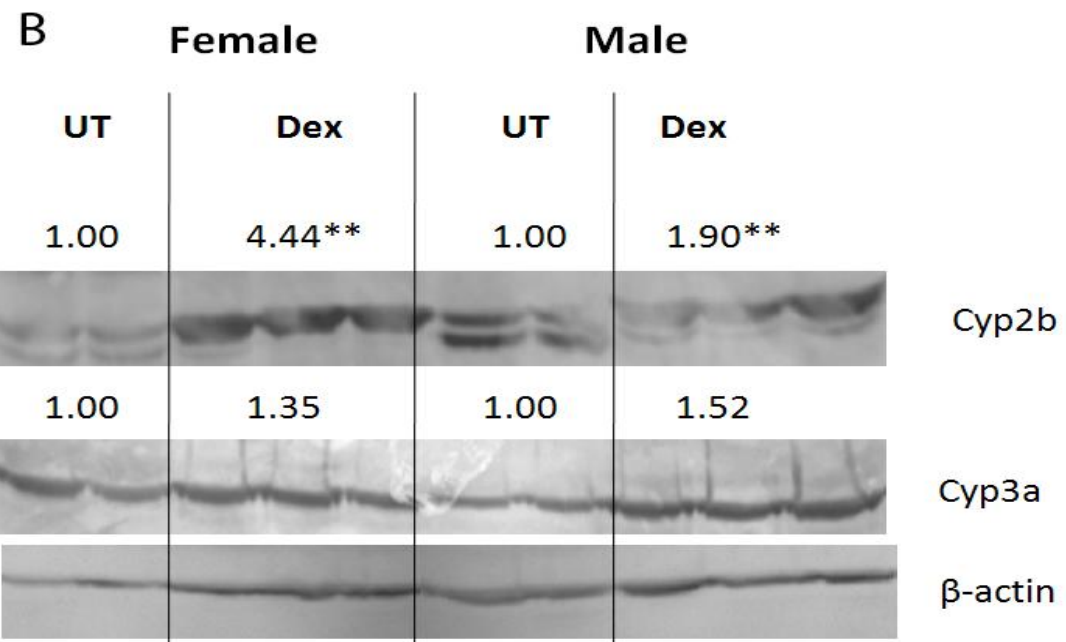

hPXR mice

Supplement: NIHMS278707-supplement-01.pdf [file NIHMS278707-supplement-01.pdf]
